---

1 **Rational cell culture optimization**  
2 **enhances experimental reproducibility in**  
3 **cancer cells**

4

5 Marina Wright Muelas<sup>1,2,6\*</sup>, Fernando Ortega<sup>5</sup>, Rainer Breitling<sup>6</sup>, Claus Bendtsen<sup>2</sup>, Hans V. Westerhoff<sup>1,4,6</sup>

6

7 <sup>1</sup>Manchester Centre for Integrative Systems Biology and Doctoral Training Centre, Manchester Institute of Biotechnology, University of  
8 Manchester, 131 Princess Street, Manchester M1 7DN, UK

9 <sup>2</sup>Quantitative Biology, Discovery Sciences, AstraZeneca R&D, Cambridge Science Park, Cambridge, Cambs, CB4 0WG, UK

10 <sup>4</sup>Netherlands Institute for Systems Biology, VU University Amsterdam and University of Amsterdam, The Netherlands

11 <sup>5</sup>Manchester Pharmacy School, University of Manchester, Stopford Building, Oxford Road, Manchester, M13 9PT, UK

12 <sup>6</sup>Manchester Institute of Biotechnology, University of Manchester, 131 Princess Street, Manchester M1 7DN, UK

13 \*Corresponding author: Marina Wright Muelas ([marina.wrightmuelas@manchester.ac.uk](mailto:marina.wrightmuelas@manchester.ac.uk))

14

---

15 **Abstract**

16

17 Optimization of experimental conditions is critical in ensuring robust experimental  
18 reproducibility. Through detailed metabolomic analysis we found that cell culture conditions  
19 significantly impacted on glutaminase (GLS1) sensitivity resulting in variable sensitivity and  
20 irreproducibility in data.

21 Baseline metabolite profiling highlighted that untreated cells underwent significant changes  
22 in metabolic status. Both the extracellular levels of glutamine and lactate and the intracellular  
23 levels of multiple metabolites changed drastically during the assay. We show that these  
24 changes compromise the robustness of the assay and make it difficult to reproduce.

25

26 We then devised 'metabolically rationalized standard' assay conditions, in which  
27 glutaminase-1 inhibition reduced glutamine metabolism differently in both cell lines assayed,  
28 and decreased the proliferation of one of them. The adoption of optimized conditions such  
29 as the ones described here should lead to an improvement in reproducibility and help  
30 eliminate false negatives as well as false positives in these assays.

31

32 **Keywords:** Cell culture, metabolomics, cancer cell lines, non-small cell lung cancer, drug discovery.

---

33

34

35

## 36 1 Introduction

37

38 Reproducibility has increasingly become a topic of concern in biomedical research<sup>1,2</sup>.  
39 Scientists acknowledge that they fail to reproduce even their own experiments, let alone  
40 those of their colleagues around the globe<sup>3</sup>. When testing a potential anticancer drug, a  
41 novel and potent allosteric inhibitor specific for the glutaminase-1 enzyme (EC 3.5.1.2), we  
42 initially experienced a similar irreproducibility. Our focus on metabolomics led us to  
43 experiments that then produced an explanation for the lack of reproducibility, and employed  
44 a more comprehensive assay development approach which we believe can be of benefit for  
45 the scientific community.

46

47 One of the initial steps in the development of therapeutic agents for cancer involves testing  
48 these agents *in vitro* using human cancer cell lines as experimental models<sup>4,5</sup>. Using primary  
49 cell lines in culture, the effects of compounds or perturbations on cell proliferation, DNA  
50 replication or cell death is generally investigated over a period of time. These types of read-  
51 out are highly dependent on cell physiology and as such these assays need to fulfill a  
52 number of conflicting conditions. On the one hand, cells need to be kept in culture long  
53 enough to attain a steady state and for the effects of treatments to be observed. On the  
54 other hand, they should not be kept there too long because of the gradual accumulation of  
55 waste products that can be inhibitory or toxic to cells, such as lactate and ammonia<sup>6</sup>. The  
56 concentration of nutrients will fall over time, pH will change, and as cells grow and divide,  
57 space may become limiting. As cell density increases, effects of paracrine signaling become  
58 more pronounced and as cells reach confluence, contact inhibition may suppress  
59 proliferation. Although cancer cells are able to proliferate for some time after reaching  
60 confluence by then accumulating on top of one another, this crowding still limits individual  
61 cells' access to nutrients and growth factors<sup>7</sup>, eventually resulting in cell cycle arrest and  
62 apoptosis, but long before then, in shifts in cell metabolism. Cell viability assays are affected  
63 by the metabolic state of the cells and therefore any shift in metabolic states during the  
64 assay, and particularly different shifts between sensitive and resistant cell lines, would  
65 confound the outcome of such assays.

66

67 Recently, Haibe-Kains *et al.* highlighted multiple inconsistencies between two large-scale  
68 pharmacogenomic studies, the Cancer Genome Project (CGP<sup>8</sup>) and the Cancer Cell Line  
69 Encyclopedia (CCLE<sup>9</sup>), *viz.* the sensitivity profiles of common cell lines and drugs<sup>10</sup>. It has  
70 been suggested that differences in the cell culture conditions were amongst the reasons for

71 these discrepancies<sup>11</sup> and that consistency should be achievable with appropriate laboratory  
72 and analysis protocols<sup>12</sup>. For example, for each cell line the CGP study determined the  
73 seeding density that ensured that each was still in the growth phase at the end of the assay  
74 (~70% confluence), whilst the seeding density was not reported for the CCLE study<sup>8</sup>. In  
75 addition, for adherent cells, the test compound was added ‘around 12–24 hours’ after  
76 seeding cells and studied over a further 72–84 hours in the CCLE study, whereas in the  
77 CGP study this was added 1 day after seeding and assayed 72 hours after treatment. This  
78 lack of standardized and well-described culture conditions is common to most literature in  
79 this field (see refs. <sup>13-19</sup> for examples). Living cells are complex; they adjust to altering  
80 environments, by quick metabolic or somewhat slower gene-expression regulation and this  
81 may readily change the extent to which any target limits cell physiology and survival. This  
82 can make results of drug targeting studies irreproducible unless the relevant environmental  
83 conditions are well controlled at the appropriate time scale. Both academia and the  
84 pharmaceutical industry recognize the necessity of much more thorough standardization to  
85 improve reproducibility <sup>20</sup>.

86

87 The metabolic performance of the cell lines during drug targeting assays is not assessed  
88 routinely, or at least not reported. Metabolic changes could have strong implications for  
89 therapeutic targets in, or affected by, intermediary metabolism. Metabolic enzymes involved  
90 in cellular proliferation and growth have been identified as altered in cancers, either through  
91 the expression of cancer-specific isoforms, through mutations, or through altered expression  
92 levels<sup>21</sup>. And it is precisely these targets that are witnessing revived interest of late<sup>22,23</sup>: these  
93 altered metabolic pathways are now being targeted directly, used to enhance the efficacy of  
94 existing therapeutic agents or to overcome resistance to current treatment strategies for  
95 cancer. In addition, anti-cancer drugs that do not target metabolism itself are often assayed  
96 in survival based assays. If metabolism is so involved in cell survival, its variability and  
97 during survival based assays could therefore be a prime cause of irreproducibility of the  
98 outcome of the many experimental assays. We thus investigated whether variability in  
99 cellular metabolic status is linked with different phenotypic responses.

100

101 Here we show how culture conditions widely used to investigate the effects of an inhibitor of  
102 the glutaminase-1 enzyme on cell proliferation and metabolism, result in drastic and rapid  
103 changes in the metabolic state of the cells, compromising the robustness and reproducibility  
104 of the results. We then present the pipeline we engage in such cases in order to identify

105 these changes and to optimize culture conditions accordingly. The reward is a robust study  
106 of the effects of a potentially important anti-proliferative agent.

107

108

## 109 **2 Results**

110

111 To investigate the effect of an inhibitor (GLS1i) of the glutaminase-1 enzyme (GLS1,  
112 EC 3.5.1.2), on cell metabolism and proliferation, we started by employing culture conditions  
113 that are widely used in the scientific literature for proliferation assays and should enable the  
114 application of metabolomics<sup>13-19</sup>. We seeded cells at a density of  $8 \times 10^5$  cells/well in 1 mL of  
115 culture media 24 hours prior to commencing the experiment at a time point denoted as time  
116 0 by adding 1.0  $\mu$ M of a GLS1 inhibitor (see Materials and Methods section 1.2). The effect  
117 of this inhibitor on cell survival was determined 48-hours later. We used two cell lines, A549  
118 and H358, that are dependent on glutamine for proliferation<sup>24</sup>, but differ in sensitivity to a  
119 novel and potent inhibitor of GLS1 activity developed jointly by AstraZeneca and Cancer  
120 Research Technology: proliferation of A549 cells is inhibited by this 'GLS1i', whereas  
121 proliferation of H358 cells is insensitive to GLS1 inhibition (Figure S1).

### 122 **2.1 The problem: the inhibitor does not seem to work**

123

124 We had expected that treatment with a GLS1 inhibitor would lead to a reduced consumption  
125 of glutamine, a reduced production of glutamate, an increased intracellular concentration of  
126 glutamine, a reduced intracellular concentration of glutamate and reduced intracellular  
127 concentrations of all TCA cycle intermediates, particularly in the GLS1i sensitive A549 cell  
128 lines. The initially observed effects of GLS1i treatment were very different to what we  
129 expected (Table 1): GLS1i treatment did not affect cell numbers in either cell line when  
130 compared to control treatment (Figure S2a). Equally unexpectedly, the amount of glutamine  
131 consumed was reduced to a much greater extent in the resistant cell line than in the  
132 sensitive cell line (Figure 1a). Intracellular glutamine concentrations were raised in treated  
133 conditions in both cell lines (Figure 1b), particularly in the resistant H358 cell lines compared  
134 to controls, in agreement with our expectations. However, intracellular glutamate  
135 concentrations were reduced in the GLS1i resistant H358 cell lines only (Figure 1c). The  
136 abundance of TCA cycle intermediates, such as alpha-ketoglutarate ( $\alpha$ -KG), citrate and  
137 fumarate, was unaffected by treatment of A549 cells with GLS1i. Only  $\alpha$ -KG was reduced in  
138 H358 cells (Figure S3).

139

140 A first clue on what could be responsible for the lack of effect of the metabolic inhibitor on  
141 the cell proliferation and the paradoxical effects on metabolism, was the extracellular  
142 concentration of glutamine at the end of this assay: this was very close to undetectable  
143 levels, suggesting that during the assay cells had been subject to a concentration of  
144 glutamine varying between 2mM and 0 mM. In the absence of glutamine, an inhibitor of  
145 glutaminase should perhaps not be expected to have any effect; either directly or due to  
146 metabolic rewiring.

## 147 **2.2 Explanation: The cellular environment is uncontrolled**

148

149 To understand why GLS1i treatment in the above assay failed to show any significant effects  
150 on proliferation or metabolism by A549 and H358 cells we examined the changes in cell  
151 numbers and intracellular and extracellular metabolites with enhanced time resolution  
152 (Figure 2 and Figure S4).

153

154 Our results suggest that, throughout the course of the assay, the cells' environment in  
155 control conditions was changing in ways that would be expected to interfere with the cells'  
156 internal state<sup>25</sup>. Firstly, the concentration of lactate in spent media 1 hour into the assay was  
157 already above 10 mM in both cell lines (Figure 2a). H358 cells had already secreted nearly  
158 20 mM of lactate by this point, suggesting that most of the glucose available in culture media  
159 had already been consumed. In H358 cells this increase in lactate continued over the time  
160 points sampled, but in A549 cells the concentration of lactate reached its maximum level of  
161 around 14 mM 6 hours post dosing. Secondly, the concentration of glutamine in spent media  
162 was already reduced by  $\geq 70\%$  1 hour into the assay in both cell lines and undetectable by  
163 24 hours and 48 hours post dose in A549 cells and H358 cells, respectively (Figure 2b).

164

165 The fluctuating environment that the cells were exposed to in this assay likely contributed to  
166 the changes in the specific growth rate of these cells: a small increase in cell numbers was  
167 observed over the first 24 hours post dosing (Figure 2c) but was much slower than the  
168 expected growth kinetics of these two cell lines<sup>26</sup>. Moreover, between 24 and 48 hours post  
169 dosing, the number of cells in control conditions seemingly *decreased*. This could be due to  
170 the depletion of glutamine, glucose or other essential substrates not measured, to the  
171 increases in the concentration of lactate, to the resulting decrease in pH, or to contact  
172 inhibition of the cells. Deprivation of nutrients and growth factors has been shown to lead to  
173 cell cycle arrest and subsequently cell death in NSCLC cell lines indicating that this is a

174 possible explanation for the changes seen in cell numbers in this type of assay<sup>27-29</sup>. The  
175 drastic reductions in glutamine could influence normal cell metabolism and physiology, as a  
176 result of forcing cells to switch to alternative fuel sources and to deal with the problem of  
177 ammonium toxicity<sup>6</sup>. Indeed, the intracellular concentration of glutamine fell drastically  
178 throughout the assay, as did the abundance of other metabolites, albeit to a smaller extent  
179 (Figure S4). The high concentration of secreted lactate in spent media is likely to be  
180 accompanied by drastic acidification of culture media and cellular damage<sup>30,31</sup>; the culture  
181 media had a buffering capacity of around 20 mM/pH unit, whilst some 20 mM of lactic acid  
182 may have been produced, a large proportion of which was likely derived from glucose.

183

184 Our results suggest that these commonly used assay conditions are unsuitable for  
185 comparing inhibitors of molecular targets with each other.

186

### 187 **2.3 Assay optimization: Reducing the seeding density and increasing culture** 188 **volume stabilizes cellular state**

189

190

191 Increasing the volume of culture media alone from 1 to 3 mL was not sufficient to avoid  
192 these problems of variations in metabolic state (Figure S5): Whilst this reduced the  
193 magnitude of changes in the extracellular concentrations of glucose and glutamine, these  
194 key nutrients were still close to depletion 72 hours after seeding. pH changes remained  
195 within acceptable ranges in A549 cells, but not in H358 cells where pH changed by > 1 pH  
196 unit. A slight improvement in the proliferation of these two cell lines was observed but this  
197 was still much slower than expected. Confluence was reached early into the assay (24–36  
198 hours after seeding) when the cell lines were seeded at a density of  $8 \times 10^5$  cells/well  
199 (Figure 3, upper purple line). This, together with the drastic reductions in nutrient  
200 concentrations through the assay, may account for the reduced rate of proliferation observed  
201 in our previous assays as a result of the induction of cell cycle arrest and apoptosis<sup>7,27-29,32</sup>.

202

203 Indeed, we observed steadier metabolic conditions and cell proliferation when the initial  
204 seeding density of cells was reduced *and* the volume of culture media increased from 1 to 3  
205 mL (Figure 3 and Figure S5). The period of time during which cells were able to grow  
206 exponentially was also increased (Figure 3). Ensuring that confluence remained below ~ 80  
207 % throughout the assay window (24–72 hours post seeding), or that this level of confluence  
208 was reached as late as possible in the assay, required a significant reduction in the initial

209 seeding density of cells, and this was cell-line specific. The time required to recover from  
210 reseeding also differed between cell lines and was affected by the initial seeding density.  
211 This initial lag phase was very short in duration for A549 cells (< 6 hours) compared to the  
212 approximately 24 hours required by H358 cells (Figure 3), which extended beyond 24 hours  
213 when H358 cells were seeded at  $2 \times 10^5$  cells/well. These differences in growth kinetics  
214 could well compromise inhibitor assays.

215

216 Lowering the initial seeding density of cells also reduced the magnitude of changes in the  
217 concentrations of key nutrients such as glucose and glutamine (Figure S5b and c), and in pH  
218 (Figure S5a) throughout the assay window (24–72 hours post seeding). In the case of the  
219 H358 cell line, using these conditions, assays beyond 48 hours after seeding may not be  
220 suitable since these cells displayed a high rate of glucose consumption (Figure S5b) and the  
221 corresponding lactate secretion would lead to significant reductions in pH (Figure S5a).  
222 When H358 cells were seeded at  $3 \times 10^5$  cells/well, the concentration of glucose reached  
223 limiting levels (~2 mM) 72 hours after seeding, which would constitute 48 hours post dosing  
224 in an assay where treatment was applied 24 hours after seeding (Figure S5b).

225

226 We conclude that, in order to ensure that (1) cells are in exponential growth from 24 hours  
227 after seeding, (2) confluence is reached as late as possible, and (3) changes in glucose,  
228 glutamine and pH are kept to a minimum, the volume of culture media should be increased  
229 up to 3 mL and seeding density reduced according to individual cell line growth kinetics. In  
230 our case, seeding A549 cells at a density of  $2 \times 10^5$  cells/well or less, and H358 cells at  
231 around  $3 \times 10^5$  cells/well in 3 mL of culture media, fulfills these criteria.

232

#### 233 **2.4 Optimized in vitro culture conditions enable successful hypothesis validation** 234 **and discovery**

235

236 To validate the expected improvement in assay performance we then seeded A549 and  
237 H358 cells at a density of  $1.5 \times 10^5$  and  $3 \times 10^5$  cells/well respectively in 3 mL of media in a  
238 6 well plate format. Cells were growing exponentially at rates comparable to those reported  
239 in the literature<sup>26</sup> (Figure S6) throughout the assay in control conditions. From plates  
240 prepared in parallel, the levels of various metabolites in cell and spent media extracts as well  
241 as cell numbers were measured for 24 hours after treatment with 1  $\mu$ M of the GLS1 inhibitor.  
242 In agreement with our expectations (Table 1), treatment with the GLS1 inhibitor over 24  
243 hours led to a reduction in cell numbers of around 20% in A549 cells but not in H358 cell



244 lines (Figure 4a). Throughout the assay, the changes in the cells' environment were now  
245 minimal in both cell lines regardless of treatment conditions (Figure 4b-f): the concentrations  
246 of glucose and glutamine were reduced by less than 50% over the assay and the lactate  
247 secreted caused a pH drop  $< 1$  unit under these improved assay conditions. The amount of  
248 glutamine consumed appeared reduced in both cell lines by treatment with the GLS1  
249 inhibitor although these changes were small and only statistically significant in A549 cells:  
250 the achieved stability of culture conditions had the consequence that differences in cellular  
251 metabolism were no longer strongly reflected in the changes of the exometabolome, such  
252 that assay conditions were now under control and steady.

253

254 We therefore assessed intracellular metabolism to investigate whether, under the optimized  
255 conditions, the predicted effects of GLS1i on intracellular metabolites were observed that  
256 had not been observed under the previous unstable conditions (Table 1). Our results confirm  
257 that the glutaminase inhibitor engaged with the intended target: large reductions ( $p < 0.01$ ) in  
258 glutamate were observed in both cell lines (Figure 5a). Only minor increases in the  
259 concentration of glutamine were seen, probably as a result of rapid equilibration with the  
260 external medium via the glutamine transporter (Figure 5b). The intracellular abundance of  
261 TCA cycle intermediates was also affected by GLS1i treatment in both cell lines (Figure 5c-  
262 e).

263

264 Our results confirm that the optimized culture conditions devised here provide a robust and  
265 stable environment in which to reproducibly assay the effects of a GLS1 inhibitor on cell  
266 metabolism and proliferation.

267

### 268 **3 Discussion**

269

270 The assay with which we started this study failed to demonstrate any consistent effects of  
271 glutaminase inhibition on either glutamine metabolism or proliferation in these two cancer  
272 cell lines: addition of the inhibitor to cells (A549) known to be sensitive to the inhibitor, had  
273 no apparent effect on their proliferation (Figure S2a). Conversely, the glutamine metabolism  
274 by cells (H358) that are *insensitive* to the same inhibitor was reduced to a much greater  
275 extent than that by sensitive (A549) cells (Figure 1). We then demonstrated that these  
276 inconsistencies were artifacts, for one, because most glutamine had been depleted in the  
277 pre-incubation period (Figure 1b and 2b) leaving too little glutamine for effects of the inhibitor  
278 to become statistically noteworthy.

279

280 With our improved assay conditions we were able to show that the glutaminase inhibitor  
281 (GLS1i) does have an effect on glutamine metabolism of both cell lines, but that only the  
282 proliferation of the A549 cells is reduced (Figure 4). GLS1 inhibition was also apparent from  
283 the changes in levels of intracellular metabolites in both cell lines, but with distinct  
284 differences between sensitive (A549) and resistant (H358) cell lines (Figure 5).

285

286 Our findings highlight the importance of *in vitro* assay optimization for the assessment of the  
287 potential of metabolic, and probably also other, inhibitors as anti-cancer drugs that impact on  
288 cellular metabolism. Variability in the metabolic state during the assay may well create false  
289 positives and false negatives because intermediary and energy metabolism is full of  
290 pleiotropic implications. Importantly perhaps, the implications of our findings are unlikely to  
291 be limited to studies of metabolic inhibitors. Other inhibitors, such as those of cell signaling  
292 or transcription require even longer cell incubations, and may therefore be compromised  
293 even more by changes in the levels of metabolites such as ATP, NADH, acetyl-CoA and  
294 glutamate that cross-talk widely. Even though metabolism may not be the drug target in  
295 these cases, its perturbation due to inappropriate culture conditions, might produce a false  
296 response. And since the drug may well affect metabolism indirectly, the impact of metabolic  
297 status could be overlooked in both control and treated conditions.

298

299 Perhaps even more so than this, our results should warn against the straightforward  
300 implementation of historically-fixed sets of conditions for drug assays in cell lines. Living  
301 cells are complex enough to engage in all sorts of metabolic changes, these changes may  
302 well differ between individual cell lines, and the metabolome is sensitive to such changes  
303 well before the metabolic fluxes produced by the cells are<sup>33</sup>. We therefore advocate that  
304 reports on drug assays are accompanied by a thorough description of the experimental  
305 procedure used as well as by a metabolic characterization of the cells during the assay,  
306 such as in the workflow we demonstrated here. After all, such characterization has become  
307 possible over recent years.

308

309 Indeed, reports in the literature regarding the characteristics of cell lines under basal and  
310 perturbed conditions may have overlooked changes in the metabolic environment of cells or  
311 high cell density. Such aspects are typically not reported or measured and may contribute to  
312 the irreproducibility of the results when repeating the assay in a different laboratory. Such  
313 irreproducibility is fueling the reproducibility debate<sup>1,2</sup>.

314

315 Not only do our results highlight the need for reporting experimental ‘details’ concerning  
316 culture conditions, they also show a way towards rationalizing and standardizing these.  
317 Required details would include, but not be limited to, information on the source of cell lines  
318 and passage number (or at least whether all cells used were below a certain passage  
319 number), number of cells per well at the time of seeding and throughout the assay,  
320 density/confluence throughout the assay, volume of culture media used, details of cell  
321 culture flasks used, length of assay (from time of seeding), choice of cell culture medium  
322 (including concentrations of all components) and sera (concentration used and source), and  
323 how concentrations of key nutrients (e.g. glucose and glutamine) and pH change throughout  
324 the assay. This would complement existing efforts for standardization across biomedical  
325 research<sup>34-36</sup> and improve reproducibility, transparency and evaluation of the experimental  
326 data, points that are of critical concern<sup>37</sup>.

327

328 A number of reporting guidelines for the results of biological assays have been in existence  
329 for some time, e.g. the Minimum Information About a Microarray Experiment (MIAME)  
330 standard. MIAME is now a reporting requirement for a number of funding agencies and  
331 journals<sup>38</sup>. Similarly, there are now minimum reporting standards in use for metabolomics<sup>35</sup>,  
332 proteomics<sup>36</sup> and systems biology models<sup>39</sup>. Since 2008, the Minimum Information for  
333 Biological and Biomedical Investigations (MIBBI) project has acted as a repository for the  
334 many minimum reporting guidelines that have since been created; there are now over 40 for  
335 the biological and biomedical sciences (<https://biosharing.org/standards/>, accessed 04 July  
336 2016).

337

338 The assay developed and discussed here, as well as the contention that it should be  
339 accompanied by metabolic analyses of the assay cell lines, should contribute to improved  
340 assay reproducibility in cell biology and drug discovery.

341

342 **Figures and Tables**

343 **Table 1: Predicted versus observed effects of treatment with the GLS1i inhibitor using the prevalent**  
 344 **culture conditions compared with the optimized culture conditions devised in this study.**

| Predicted effect of GLS1i treatment...   |            | Prevalent culture conditions | Optimized culture conditions |
|------------------------------------------|------------|------------------------------|------------------------------|
| <b>...in sensitive A549 cells</b>        |            |                              |                              |
| Cell numbers ↓                           |            | ✗                            | ✓                            |
| Glutamine consumption ↓                  |            | ✓                            | ✓                            |
| Glutamate production ↓                   |            | ✗                            | ✓                            |
| Glutamine (intracellular) ↑              |            | ✓                            | ✓                            |
| Glutamate (intracellular) ↓              |            | ✗                            | ✓                            |
| TCA cycle intermediates (intracellular): | α-KG ↓     | ✗                            | ✗                            |
|                                          | Citrate ↓  | ✗                            | ✓                            |
|                                          | Fumarate ↓ | ✗                            | ✓                            |
| <b>...in resistant H358cells</b>         |            |                              |                              |
| Cell numbers unchanged                   |            | ✓                            | ✓                            |
| Glutamine consumption ↓                  |            | ✓                            | ✓                            |
| Glutamate production ↓                   |            | ✗                            | ✓                            |
| Glutamine (intracellular) ↑              |            | ✓                            | ✓                            |
| Glutamate (intracellular) ↓              |            | ✓                            | ✓                            |
| TCA cycle intermediates (intracellular)  | α-KG ↓     | ✓                            | ✓                            |
|                                          | Citrate ↓  | ✗                            | ✗                            |
|                                          | Fumarate ↓ | ✗                            | ✓                            |

345

346 ✓ : significantly as predicted at  $p < 0.05$

347 ✗ : not significantly as predicted, i.e.  $p > 0.05$ .

348

349

350

351

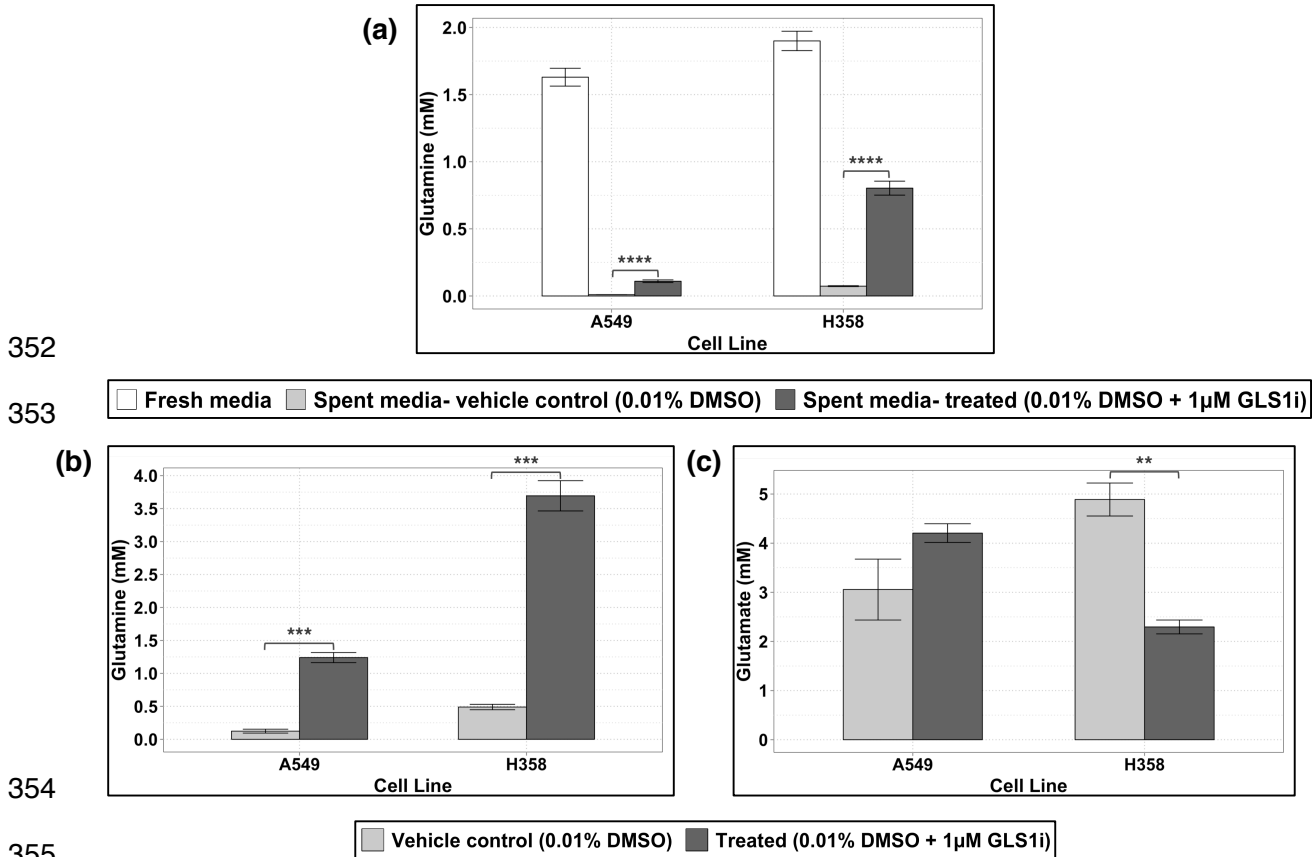

**Figure 1: Glutamine and glutamate concentrations 48 hours after treatment with 0.01% DMSO ± 1 µM GLS1i using a prevalent assay method.** A549 and H358 are known as sensitive and resistant cell lines, respectively, vis-à-vis glutaminase 1 inhibitors. Concentrations of (a) extracellular glutamine (b) intracellular glutamine and (c) intracellular glutamate measured by LC-UV after 24 h of treatment with 0.010 % DMSO ± 1.0 µM (final concentrations) GLS1i. For this single experiment, measurements were performed in triplicate for control and treated conditions. Cells had been seeded at a density of  $8 \times 10^5$  cells/well in 1 ml of culture media 24 h prior to commencing the experiment. Shown are the mean ± SEM for the 3 technical replicates per cell line and treatment condition. Unadjusted p-values of the differences between control and treated samples obtained using a two-tailed Student's t-test are denoted with asterisks: \*\*:  $p \leq 0.01$ ; \*\*\*:  $p \leq 0.001$ ; \*\*\*\*:  $p \leq 0.0001$ .

365

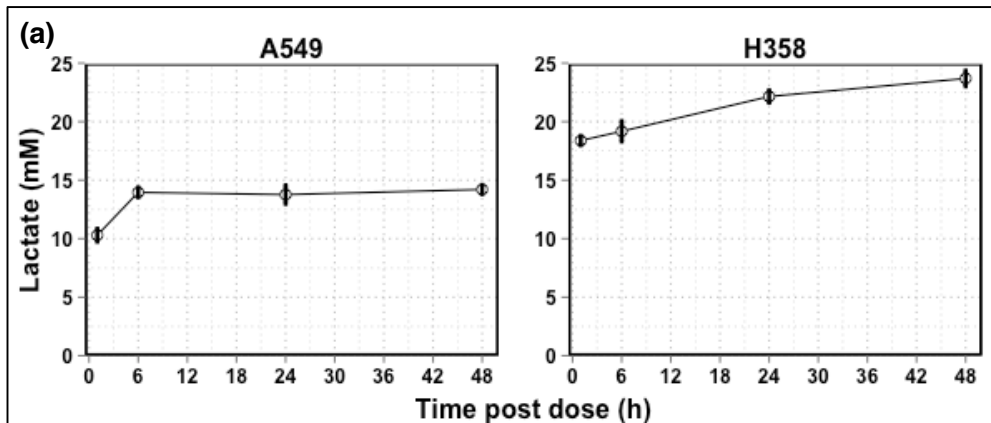

366

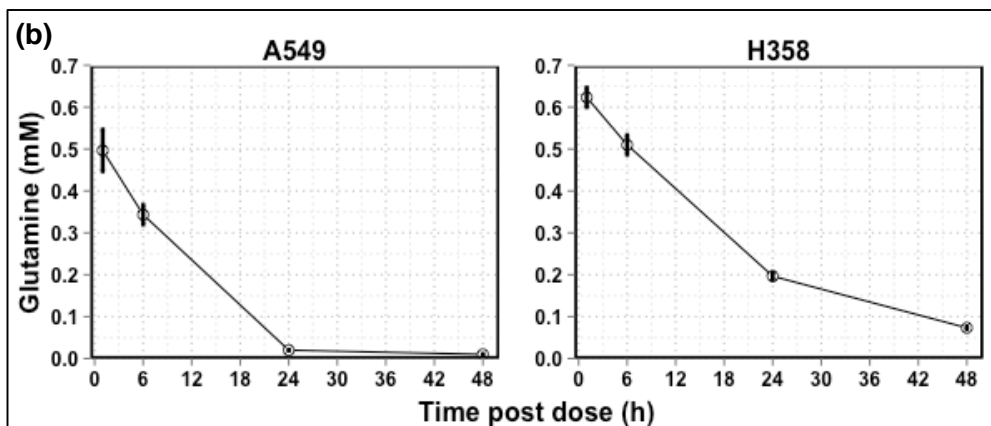

367

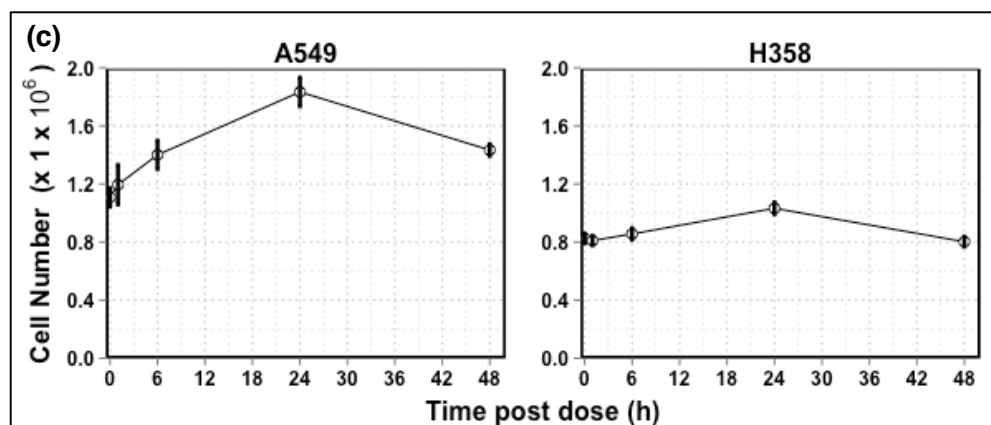

368

369 **Figure 2: Changes with time after seeding of the state of a cell culture in a traditional assay in vehicle**  
370 **control (0.01% DMSO) and treatment conditions. (a) Lactate (measured by LC-MS) and (b) glutamine**  
371 **(measured by LC-UV) in spent medium. (c) Number of live cells per well as measured using the Trypan blue**  
372 **exclusion technique using a Countess automated cell counter (Thermo Scientific, Loughborough, UK). Zero time**  
373 **corresponds to 24 hours after seeding of cells into a medium containing 10 mM of glucose, 2 mM of glutamine, in**  
374 **addition to dialyzed fetal calf serum, vitamins and both essential and non-essential amino acids at concentrations**  
375 **well below 1mM except for arginine (0.95 mM) and glutamine (2 mM), as shown in Table M1 in Materials and**  
376 **Methods. The cell lines were: A549 (left) and H358 (right). For this single experiment, measurements were**  
377 **performed in triplicate. Shown are the mean  $\pm$  SEM for the 3 technical replicates per cell line in control**  
378 **conditions.**

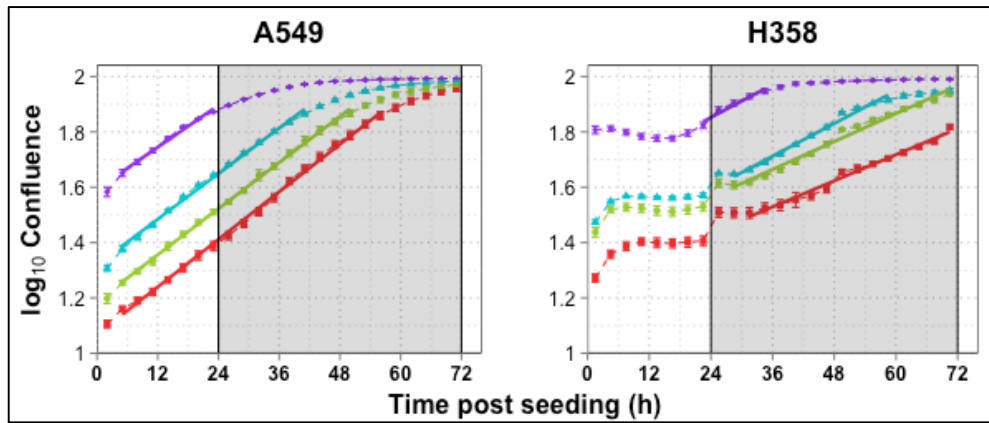

379

380

Seeding Density (cells/well): ■  $2 \times 10^5$  ●  $3 \times 10^5$  ▲  $4 \times 10^5$  ◆  $8 \times 10^5$

381

**Figure 3: Confluence of A549 and H358 cells over 72 hours after seeding at different initial densities**

382

**when the volume of culture media was increased to 3 mL. Shown are the changes in  $\log_{10}$  confluence over**

383

time measured by live content cell imaging Incucyte HD system (Essen Bioscience) when A549 and H358 cells

384

were seeded at a density of  $8 \times 10^5$ ,  $4 \times 10^5$ ,  $3 \times 10^5$  and  $2 \times 10^5$  cells/well. For this single experiment,

385

measurements were performed in triplicate for control and treated conditions. Shown are the mean  $\pm$  SEM for the

386

3 technical replicates per cell line and treatment condition. Shaded area denotes the assay window in a prevalent

387

assay where samples would be taken over 48 hours from the time of dosing (24 hours after seeding). Solid lines

388

are a fitted linear model for the exponential growth phase of cells.

389

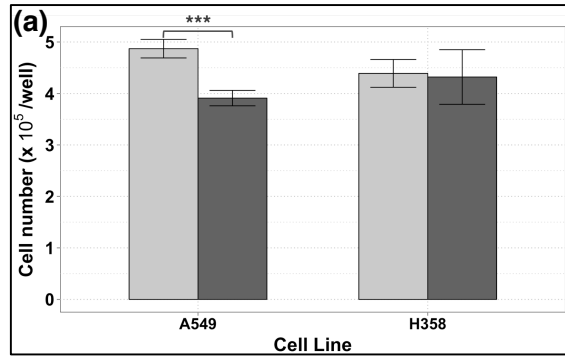

390

■ Vehicle control (0.01% DMSO) ■ Treated (0.01% DMSO + 1 $\mu$ M GLS1i)

391

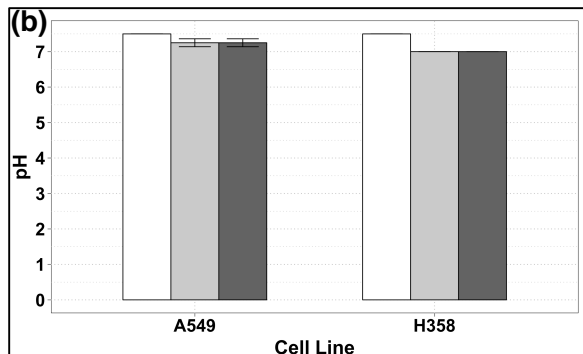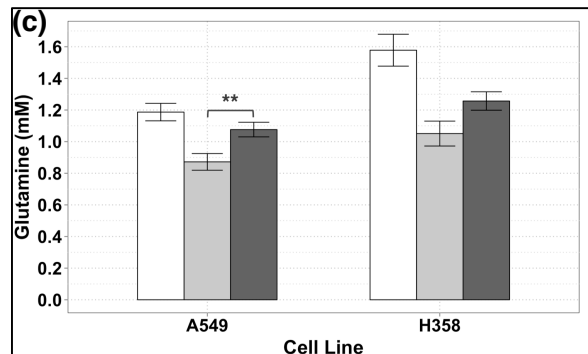

392

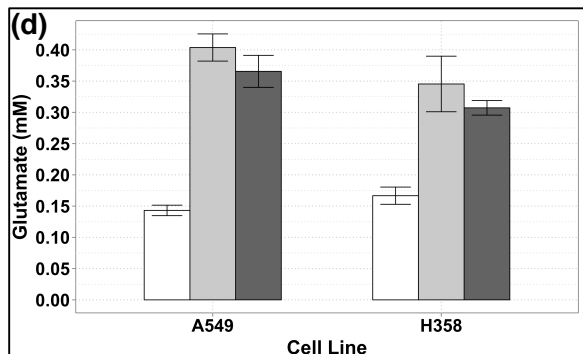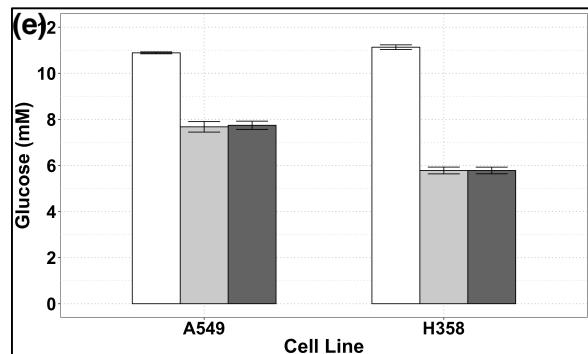

393

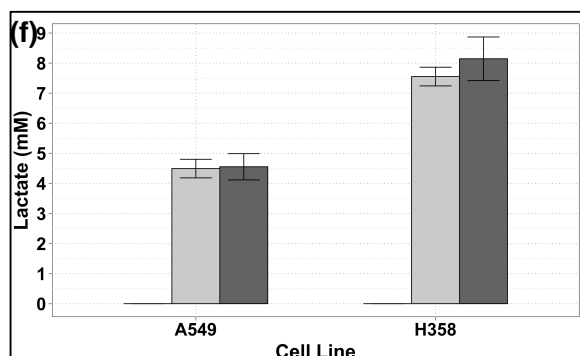

394

□ Fresh media ■ Spent media- vehicle control (0.01% DMSO) ■ Spent media- treated (0.01% DMSO + 1 $\mu$ M GLS1i)

395 **Figure 4: Live cell numbers, concentrations of various metabolites, and pH in fresh and spent media**  
 396 **extracts 24 hours after treatment with 0.010 % DMSO  $\pm$  1.0  $\mu$ M GLS1i using the improved culture**  
 397 **conditions devised here. (a) Live cell numbers as measured by automated microscopy following Hoechst**  
 398 **staining and fixation (See Materials and Methods 1.6). (b) pH of fresh and spent media samples measured using**  
 399 **MColorpHast indicator strips. Concentration of (c) glutamine, (d) glutamate, (e) glucose and (f) lactate in fresh**



400 and spent media samples after treatment with or without 1.0  $\mu$ M GLS1i measured by LC-UV (glutamine and  
401 glutamate), Accu-Chek Aviva Blood Glucose Meter System (glucose) and LC-MS (lactate). For each experiment,  
402 measurements were performed in triplicate for control and treated conditions. Shown are the mean  $\pm$  SEM of 3  
403 (A549 cell line; 9 data points per condition) or 2 (H358 cell line; 6 data points per condition) independent  
404 experiments. Note that glutamine concentrations in fresh media used for A549 and H358 cells fell by an average  
405 of ~27 % and ~5 % respectively over the duration of the assay. Unadjusted p-values of the differences between  
406 control and treated conditions obtained using a two-tailed Student's t-test are denoted with asterisks: \*\*:  $p \leq 0.01$ ;  
407 \*\*\*:  $p \leq 0.001$ .

408

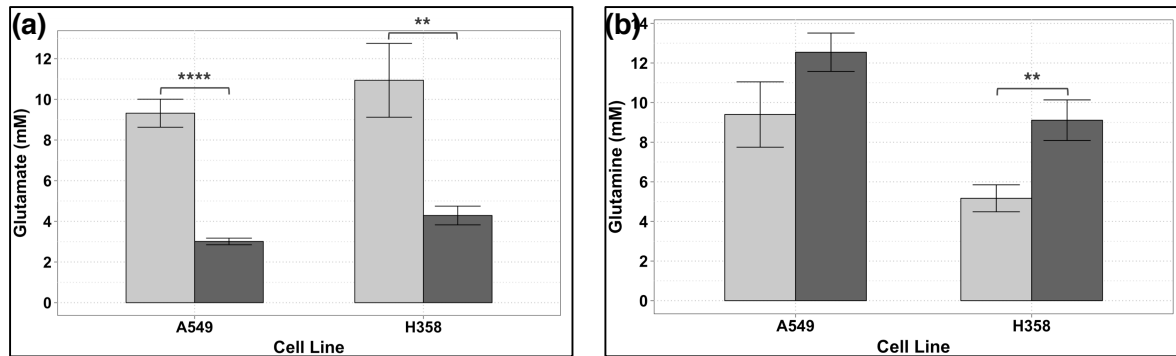

409

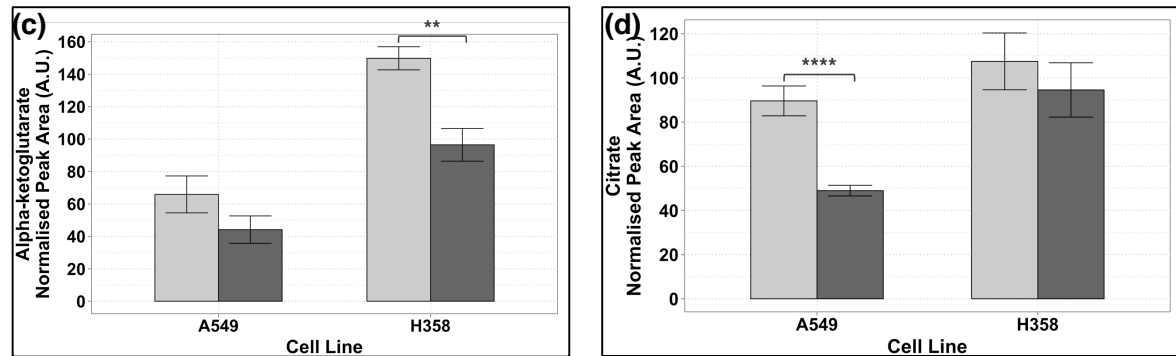

410

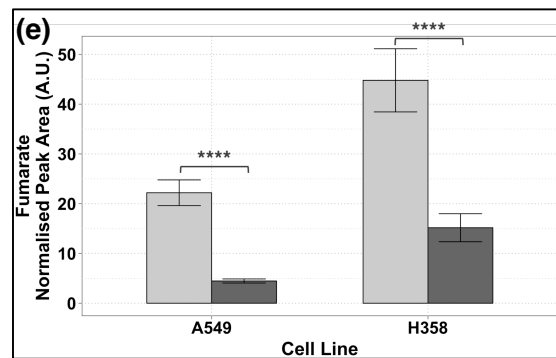

Legend:  Vehicle control (0.01% DMSO)  Treated (0.01% DMSO + 1 μM GLS1i)

411

412

413 **Figure 5: Levels of various intracellular metabolites 24 hours after treatment with 0.01% DMSO ± 1 μM**

414 **GLS1i using the improved culture conditions devised here.** A549 and H358 are known as sensitive and

415 resistant cell lines, respectively. Concentration of (a) glutamate and (b) glutamine measured by LC-UV, and

416 relative abundance of the TCA cycle intermediates (measured by LC-MS) (c) alpha-ketoglutarate, (d) citrate and

417 (e) fumarate in cells after treatment with or without 1 μM GLS1i. For each experiment, measurements were

418 performed in triplicate for control and treated conditions. Shown are the mean ± SEM of 3 (A549 cell line; 9 data

419 points per condition) or 2 (H358 cell line; 6 data points per condition) independent experiments. Unadjusted p-

420 values of the differences between control and treated conditions obtained using a two-tailed Student's t-test, the

421 results of which are denoted with asterisks: \*\*: p ≤ 0.01; \*\*\*: p ≤ 0.001; \*\*\*\*: p ≤ 0.0001.

422 **4 Acknowledgements**

423

424 We thank S. E. Critchlow for guidance and B. Patel and S. Powell for providing the GLS1  
425 inhibitor compound and sensitivity data (such as Fig. S1) for this work, as well as F.  
426 Michopoulos and H. Lewis for training, and use of the analytical instrumentation. We also  
427 thank Atilla Ting for feedback and comments on review of this manuscript. This work was  
428 supported the Biotechnology and Biological Sciences Research Council (BBSRC) CASE  
429 studentship grant in partnership with AstraZeneca (award number 1088313).

430

431 **5 Author Contributions**

432 MWM and HVW established the aim and strategy of the study and  
433 designed the experiments, which MWM performed. FO, RB, and CB provided advice and  
434 expertise on the design of the experiments, data acquisition and analysis. SEC, BP and SP  
435 (see acknowledgements) proposed the experimental system of glutaminase inhibition in  
436 human non-small cell lung cancer cell lines. MWM, HVW and FO wrote the paper with  
437 advice and guidance provided by RB and CB.

438

439 **6 Competing financial interests**

440 The authors declare that they have no competing financial interests.

441

## 442 7 References

443

- 444 1. Prinz, F., Schlange, T. & Asadullah, K. Believe it or not: how much can we rely on published data on potential drug  
445 targets? *Nature Reviews Drug Discovery* **10**, 712–712 (2011).
- 446 2. Errington, T. M. *et al.* An open investigation of the reproducibility of cancer biology research. *eLife Sciences* **3**, e04333  
447 (2014).
- 448 3. Baker, M. 1,500 scientists lift the lid on reproducibility. *Nature* **533**, 452–454 (2016).
- 449 4. Shoemaker, R. H. The NCI60 human tumour cell line anticancer drug screen. *Nat Rev Cancer* **6**, 813–823 (2006).
- 450 5. León, Z., García-Cañaveras, J. C., Donato, M. T. & Lahoz, A. Mammalian cell metabolomics: Experimental design and  
451 sample preparation. *ELECTROPHORESIS* **34**, 2762–2775 (2013).
- 452 6. Schneider, M. The importance of ammonia in mammalian cell culture. *Journal of Biotechnology* **46**, 161–185 (1996).
- 453 7. Freshney, R. I. in *Culture of Cells for Tissue Engineering* 1–22 (John Wiley & Sons, Inc., 2006).  
454 doi:10.1002/0471741817.ch1
- 455 8. Garnett, M. J. *et al.* Systematic identification of genomic markers of drug sensitivity in cancer cells. *Nature* **483**, 570–  
456 575 (2012).
- 457 9. Barretina, J. *et al.* The Cancer Cell Line Encyclopedia enables predictive modelling of anticancer drug sensitivity.  
458 *Nature* **483**, 603–307 (2012).
- 459 10. Haibe-Kains, B. *et al.* Inconsistency in large pharmacogenomic studies. *Nature* **504**, 389–393 (2013).
- 460 11. Hatzis, C. *et al.* Enhancing reproducibility in cancer drug screening: how do we move forward? *Cancer Research* **74**,  
461 4016–4023 (2014).
- 462 12. Haverty, P. M. *et al.* Reproducible pharmacogenomic profiling of cancer cell line panels. *Nature* **533**, 333–337 (2016).
- 463 13. Wise, D. R. *et al.* Myc regulates a transcriptional program that stimulates mitochondrial glutaminolysis and leads to  
464 glutamine addiction. *Proceedings of the National Academy of Sciences* **105**, 18782–18787 (2008).
- 465 14. Yuneva, M., Zamboni, N., Oefner, P., Sachidanandam, R. & Lazebnik, Y. Deficiency in glutamine but not glucose  
466 induces MYC-dependent apoptosis in human cells. *The Journal of Cell Biology* **178**, 93–105 (2007).
- 467 15. Le, A. *et al.* Glucose-Independent Glutamine Metabolism via TCA Cycling for Proliferation and Survival in B Cells. *Cell*  
468 *Metab.* **15**, 110–121 (2012).
- 469 16. Mullen, A. R. *et al.* Reductive carboxylation supports growth in tumour cells with defective mitochondria. *Nature* **481**,  
470 385–388 (2011).
- 471 17. Metallo, C. M. *et al.* Reductive glutamine metabolism by IDH1 mediates lipogenesis under hypoxia. *Nature* **481**, 380–  
472 384 (2011).
- 473 18. DeBerardinis, R. J. *et al.* Beyond aerobic glycolysis: Transformed cells can engage in glutamine metabolism that  
474 exceeds the requirement for protein and nucleotide synthesis. *Proceedings of the National Academy of Sciences* **104**,  
475 19345–19350 (2007).
- 476 19. Hassanein, M. *et al.* SLC1A5 Mediates Glutamine Transport Required for Lung Cancer Cell Growth and Survival.  
477 *Clinical Cancer Research* **19**, 560–570 (2013).
- 478 20. Cook, D. *et al.* Lessons learned from the fate of AstraZeneca's drug pipeline: a five-dimensional framework. *Nature*  
479 *Reviews Drug Discovery* **13**, 419–431 (2014).
- 480 21. Schulze, A. & Harris, A. L. How cancer metabolism is tuned for proliferation and vulnerable to disruption. *Nat Rev*  
481 *Cancer* **491**, 364–373 (2012).
- 482 22. Zhao, Y., Butler, E. B. & Tan, M. Targeting cellular metabolism to improve cancer therapeutics. *Cell Death Dis* **4**, e532  
483 (2013).
- 484 23. Vander Heiden, M. G. Targeting cancer metabolism: a therapeutic window opens. *Nature Reviews Drug Discovery* **10**,  
485 671–684 (2011).
- 486 24. van den Heuvel, A. P. J., Jing, J., Wooster, R. F. & Bachman, K. E. Analysis of glutamine dependency in non-small  
487 cell lung cancer. *Cancer Biology & Therapy* **13**, 1185–1194 (2012).
- 488 25. Birsoy, K. *et al.* Metabolic determinants of cancer cell sensitivity to glucose limitation and biguanides. *Nature* **508**,  
489 108–112 (2014).

- 490 26. Brower, M., Carney, D. N., Oie, H. K., Gazdar, A. F. & Minna, J. D. Growth of Cell Lines and Clinical Specimens of  
491 Human Non-Small Cell Lung Cancer in a Serum-free Defined Medium. *Cancer Research* **46**, 798–806 (1986).
- 492 27. Tinnemans, M. M. *et al.* S-phase arrest of nutrient deprived lung cancer cells. *Cytometry* **19**, 326–333 (1995).
- 493 28. Ishii, T. *et al.* Nutritional deficiency affects cell cycle status and viability in A549 cells: role of p27Kip1. *Cancer Lett.*  
494 **213**, 99–109 (2004).
- 495 29. Qie, S. *et al.* Glutamine depletion and glucose depletion trigger growth inhibition via distinctive gene expression  
496 reprogramming. *Cell Cycle* **11**, 3679–3690 (2014).
- 497 30. Huang, W. *et al.* A proposed role for glutamine in cancer cell growth through acid resistance. *Cell Research* **23**, 724–  
498 727 (2013).
- 499 31. LaMonte, G. *et al.* Acidosis induces reprogramming of cellular metabolism to mitigate oxidative stress. *Cancer Metab*  
500 **1**, 23 (2013).
- 501 32. Zininger, G. F. & Little, J. B. Proliferation kinetics of density-inhibited cultures of human cells, a complex invitro cell  
502 system. *Cancer Research* **33**, 2343–2348 (1973).
- 503 33. Raamsdonk, L. M. *et al.* A functional genomics strategy that uses metabolome data to reveal the phenotype of silent  
504 mutations. *Nat Biotechnol* **19**, 45–50 (2001).
- 505 34. Brazma, A. *et al.* Minimum information about a microarray experiment (MIAME)- toward standards for microarray data.  
506 *Nat. Genet.* **29**, 365–371 (2001).
- 507 35. Fiehn, O. *et al.* The metabolomics standards initiative (MSI). *Metabolomics* **3**, 175–178 (2007).
- 508 36. Taylor, C. F. *et al.* The minimum information about a proteomics experiment (MIAPE). *Nat Biotechnol* **25**, 887–893  
509 (2007).
- 510 37. The Academy of Medical Sciences. Reproducibility and reliability of biomedical research: improving research practice.  
511 <http://www.acmedsci.ac.uk/viewFile/56314e40aac61.pdf>
- 512 38. Taylor, C. F. *et al.* Promoting coherent minimum reporting guidelines for biological and biomedical investigations: the  
513 MIBBI project. *Nat Biotechnol* **26**, 889–896 (2008).
- 514 39. Le Novère, N. *et al.* Minimum information requested in the annotation of biochemical models (MIRIAM). *Nat Biotechnol*  
515 **23**, 1509–1515 (2005).
